# Supplementary material for: Spectrum of HNF1A Somatic Mutations in Hepatocellular Adenoma Differs From That in Patients With MODY3 and Suggests Genotoxic Damage
Source: PubMed Central journal article supplement — Diabetes. 2010 Apr 14;59(7):1836–44. doi: 10.2337/db09-1819 (PMC2889786; doi:10.2337/db09-1819), 2010-04-14

## ONLINE APPENDIX

### **Spectrum of HNF1A somatic mutations in hepatocellular adenoma differs from that in MODY3 patients and suggests genotoxic damage**

Emmanuelle Jeannot<sup>1,2\*</sup>, Lucille Mellotée<sup>1</sup>, Paulette Bioulac-Sage<sup>3</sup>, Charles Balabaud<sup>3</sup>, Jean-Yves Scoazec<sup>4</sup>, Jeanne Tran Van Nhieu<sup>5</sup>, Yannick Bacq<sup>6</sup>, Sophie Michalak<sup>7</sup>, David Buob<sup>8</sup>, Genthep (Inserm network), Pierre Laurent-Puig<sup>9</sup>, Ivan Rusyn<sup>2</sup>, and Jessica Zucman-Rossi<sup>1</sup>

<sup>1</sup>Inserm, U674, Génomique fonctionnelle des tumeurs solides; Université Paris Descartes, Paris, France

<sup>2</sup>Department of Environmental Sciences and Engineering, University of North Carolina, Chapel Hill, NC, USA

<sup>3</sup>Inserm, U889, Université Bordeaux 2, IFR66, CHU Bordeaux, Hôpital Pellegrin, Bordeaux, France

<sup>4</sup>Hôpital Edouard Herriot, Lyon, France

<sup>5</sup>AP-HP, pathology department, hôpital Henri Mondor, Créteil, France

<sup>6</sup>Hôpital Trousseau, CHRU de Tours, France

<sup>7</sup>CHU, pathology department, Angers, France

<sup>8</sup>Pôle Pathologie, Centre de Biologie Pathologie, CHR-U de Lille, France

<sup>9</sup>Inserm, U775; Université Paris Descartes, Paris, France

\*EJ has worked in Inserm U674 and is now working in the University of North Carolina.

#### **Corresponding author:**

Prof Jessica Zucman-Rossi

[zucman@cephb.fr](mailto:zucman@cephb.fr)

**Supplemental Table 1:** Conditions for amplification of *MYH* coding exons.

| Exons | Primers | Sequence primers 5'-3'  | Primer [mM] | Size product PCR | PCR program |
|-------|---------|-------------------------|-------------|------------------|-------------|
| 1     | 1F      | CTCCACTGAACTGAATCACA    | 0.3         | 462              | TD 60       |
|       | 1R      | TCTGAACGGAAGTTCGACCC    | 0.3         |                  |             |
| 2     | 2F      | CGTGAGCATCTTGAGAGTGC    | 0.3         | 345              | TD 60       |
|       | 2R      | CTTGATACGTATCACAATCCCT  | 0.3         |                  |             |
| 3-4   | 3F      | GCCCTAAGTGGGAGCATAAC    | 0.3         | 478              | TD 64       |
|       | 4R      | TTGGCATGAGGACACTGCT     | 0.3         |                  |             |
| 5-6   | 5F      | GCATTGACAGGCAGAAGATGA   | 0.3         | 484              | TD 60       |
|       | 6R      | GTCAAAGAGATCACCCGTCA    | 0.3         |                  |             |
| 7-8   | 7F      | CACCCTAGGGTAGGGGAAAT    | 0.3         | 418              | TD 56       |
|       | 8R      | ACAGAGGGGGCCAAAGAGTTA   | 0.3         |                  |             |
| 9-10  | 9F      | TTTGCCAGGTGATCTCACA     | 0.3         | 492              | TD 60       |
|       | 10R     | GGCACAGGGTTGAGTGTCAT    | 0.3         |                  |             |
| 11    | 11F     | CAGCAGCTCTGGTAGGATGT    | 0.3         | 463              | TD 56       |
|       | 11R     | TACTCAGGTTAGAGGAAGAAC   | 0.3         |                  |             |
| 12    | 12F     | GTTCTTCCTCTAACCTGAGTA   | 0.3         | 443              | TD 56       |
|       | 12R     | TCACGGACGGGAACCTCCAC    | 0.3         |                  |             |
| 13-14 | 13FLI   | AGGGCAGTGGCATGAGTAAC    | 0.3         | 507              | TD 56       |
|       | 14RLI   | CATGTAGGAAACACAAGGAAGTA | 0.3         |                  |             |
| 15    | 15F     | TGAAGTTAAGGGCAGAACACC   | 0.3         | 265              | TD 60       |
|       | 15R     | GAAGGTCTCCAGGTCAAGAA    | 0.3         |                  |             |
| 16    | 16F     | GCTAAGCCTAGCTAGATCAG    | 0.6         | 297              | TD 56       |
|       | 16R     | TAAGCACTTTACTAACAACAGGA | 0.6         |                  |             |

Abbreviation: TD: touch-down.

**Supplemental Table 2:** Conditions for amplification of *OGGI* coding exons.

| Exons | Primers | Sequence primers 5'-3' | Primer [mM] | Size product PCR | PCR program |
|-------|---------|------------------------|-------------|------------------|-------------|
| 1     | 1F      | ACCCCATGCCAGGCAGTGTTG  | 0.3         | 486              | TD 60       |
|       | 1R      | TCTGGGGCGGGAGAAGAT     | 0.3         |                  |             |
| 2     | 2F      | CGTACATGGAGCTATTGTAGG  | 0.3         | 554              | TD 56       |
|       | 2R      | ACTTCACTATGGTGATTAGC   | 0.3         |                  |             |
| 3     | 3F      | TGGTGTGCTTTCTCTAACGG   | 0.3         | 413              | TD 60       |
|       | 3R      | GGAAGCCTTGAGAAGGTAAC   | 0.3         |                  |             |
| 4     | 4F      | AGTGTCCACTATCCATAGA    | 0.3         | 383              | TD 56       |
|       | 4R      | TGCTCTCCTCTTAGTGCA     | 0.3         |                  |             |
| 5     | 5F      | CAGCCGGCTTTGGGGCTATAA  | 0.3         | 340              | TD 60       |
|       | 5R      | CTGTGACCCATCAACAGAAGT  | 0.3         |                  |             |
| 6     | 6F      | TCAGACCCTACTTCTGTTGATG | 0.3         | 313              | TD 56       |
|       | 6R      | GGTGAGACTAGTGACAGTGTT  | 0.3         |                  |             |
| 7     | 7F      | AACACTGTCAGTCTCACC     | 0.3         | 433              | TD 56       |
|       | 7R      | TCCTCACTGCATTTTCATAC   | 0.3         |                  |             |

Abbreviation: TD: touch-down.

**Supplemental Table 3:** Alleles frequencies of an *OGG1* single nucleotide polymorphism in the two groups of patients.

| Chromosomal loci | Genotypes  | Allelic frequencies |                                                      |                                                               | Fisher exact test* | Allelic frequencies |
|------------------|------------|---------------------|------------------------------------------------------|---------------------------------------------------------------|--------------------|---------------------|
|                  |            |                     | 37 patients with a mutated HNF1 $\alpha$ adenoma (%) | 58 patients with a non-mutated HNF1 $\alpha$ benign tumor (%) | <i>P</i> value     | SNP500 database (%) |
| 3p26.2           | OGG1 S326C | Ser                 | 81                                                   | 78                                                            | 0.72               | 78 $\dagger$        |
|                  |            | Cys                 | 19                                                   | 22                                                            |                    | 22 $\dagger$        |

\*Comparison between the patients with a mutated HNF1 $\alpha$  adenoma and the patients with a non-mutated HNF1 $\alpha$  benign tumor.

$\dagger$ European population.

**Supplemental Table 4:** Percentage of somatic mutations (n=136) identified in HCA and previously described in MODY3 individuals (n=364).

| Region             | Mutations      | Identified in HCA (% of total somatic mutations) | Identified in MODY3 families* (% of total) |
|--------------------|----------------|--------------------------------------------------|--------------------------------------------|
| Missense mutations |                |                                                  |                                            |
| Exon 2             | 476G>A, R159Q  | 1 (0.7)                                          | 4 (1.1)                                    |
| Exon 3             | 607C>T, R203C  | 1 (0.7)                                          | 2 (0.5)                                    |
|                    | 613A>C, K205Q  | 1 (0.7)                                          | 1 (0.3)                                    |
|                    | 620G>A, G207D  | 2 (1.4)                                          | 1 (0.3)                                    |
|                    | 686G>A, R229Q  | 1 (0.7)                                          | 6 (1.6)                                    |
| Exon 4             | 779C>T, T260M  | 2 (1.4)                                          | 1 (0.3)                                    |
|                    | 788G>A, R263H  | 1 (0.7)                                          | 1 (0.3)                                    |
|                    | 788G>T, R263L  | 1 (0.7)                                          | 1 (0.3)                                    |
|                    | 815G>A, R272H  | 1 (0.7)                                          | 10 (2.7)                                   |
| Exon 7             | 1340C>T, P447L | 1 (0.7)                                          | 3 (0.8)                                    |
| Nonsense mutation  |                |                                                  |                                            |
| Exon 2             | 526C>T, Q176X  | 1 (0.7)                                          | 1 (0.3)                                    |
| Deletions and      |                |                                                  |                                            |
| Exon 4             | 872-873insC,   | 20 (14.7)                                        | 65 (17.9)                                  |
|                    | 872-873delC,   | 6 (4.4)                                          | 5 (1.4)                                    |
| Splice site        |                |                                                  |                                            |
| Intron 2           | IVS2+1G>A      | 4 (2.9)                                          | 1 (0.3)                                    |
| Intron 5           | IVS5-2A>G      | 1 (0.7)                                          | 1 (0.3)                                    |

NOTE. \*Mutations described in Ellard and Colclough, 2006.

**Supplemental figure 1.** Expression of the HNF1 $\alpha$  protein in H-HCA. Protein levels of HNF1 $\alpha$  (75 kDa) were compared between normal liver (N1 and N2) and various types of HNF1 $\alpha$  mutants by using an antibody directed against either carboxy (C-ter) or amino (N-ter) terminus. Two mutations, IVS2+1G>A and E228X, were included in each of the experiments to ensure the reproducibility of the results. Asterisk (\*) denotes samples from two patients harboring the same mutation. Arrows denote samples with mutations leading to an early stop.

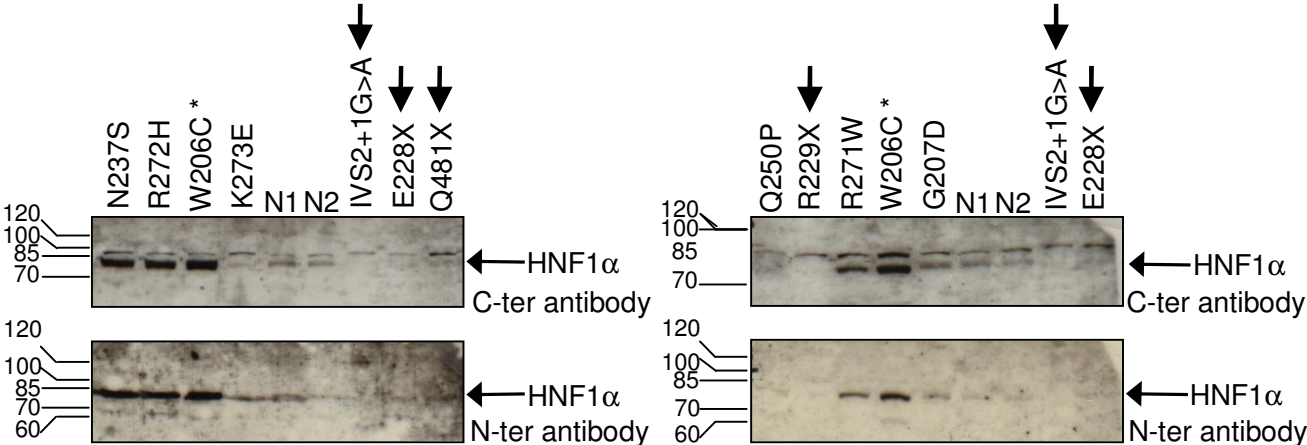

**Supplemental figure 2.** Oxidative stress markers in liver of patients with a H-HCA (n=6) or a non-*HNF1A*-mutated HCA (n=7). Total glutathione (upper left panel) and reduced glutathione (upper right panel); as well as expression of 4 base excision DNA repair genes, *MYH*, *OGG1*, *APE1*, and *POLβ* were assessed.

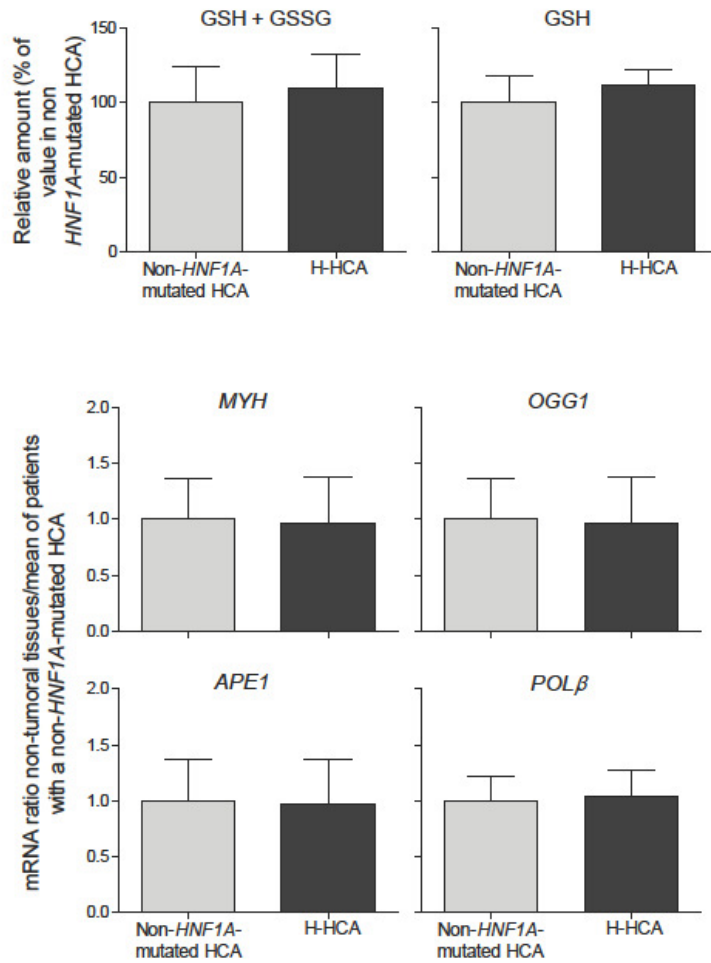

**Supplemental figure 3.** Measurement of 4-HNE protein adducts in liver. (A, C) and (B, D) are representative micrographs (100X) of 4-HNE stained liver sections from patients with a non-HNF1A-mutated adenoma (A, C) and with a H-HCA (B, D), respectively. (E) is an enlargement (400X) of the region indicated.

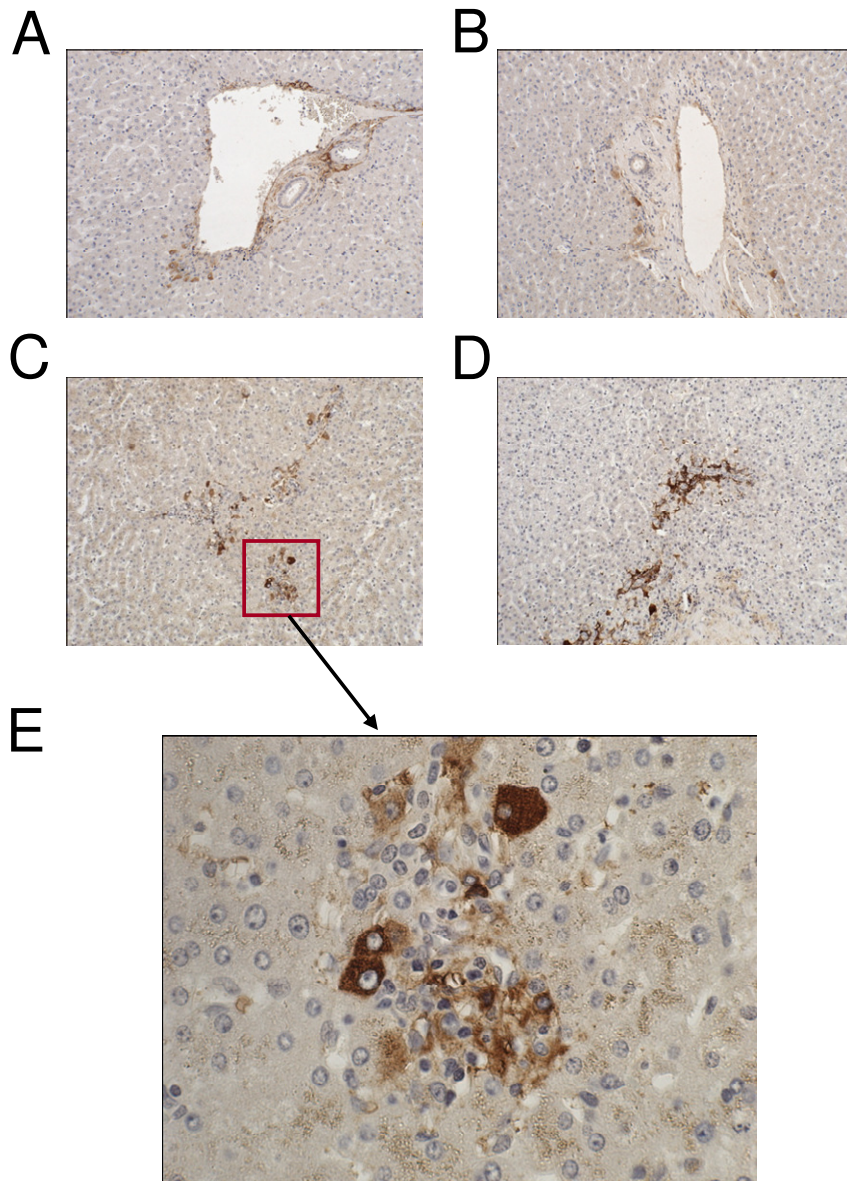

Supplement: supp_db09-1819_onlineappendix.pdf [file supp_db09-1819_onlineappendix.pdf]
